# Supplementary material for: The Fission Yeast Stress-Responsive MAPK Pathway Promotes Meiosis via the Phosphorylation of Pol II CTD in Response to Environmental and Feedback Cues
Source: PLoS Genet. 2011 Dec 1;7(12):e1002387. doi: 10.1371/journal.pgen.1002387 (PMC3228818; doi:10.1371/journal.pgen.1002387)
Supplement: Table S1 — Genes downregulated in the lsg1-deletion mutant. Genes regulated by Ste11 are marked in blue, and hsp9 is marked in yellow. (XLS) [file pgen.1002387.s006.xls]

## Sheet: Sheet1
log2(-N 2.5h lsg1∆/wt)	systematic name	common name
-4.46053	SPCC1795.06	map2
-3.94627	SPAPB8E5.05	mfm1
-3.67999	SPAC22F3.12c	rgs1
-3.28484	SPAC513.03	mfm2
-3.21648	SPAC27D7.03c	mei2
-3.00205	SPBC16E9.16c	lsd90
-2.8262	SPAC3F10.10c	map3
-2.53674	SPAC1F5.09c	shk2
-2.42386	SPCC1450.17	ste6
-2.31772	SPAC23H3.15c
-2.30777	SPAP11E10.02c	gpi8
-2.26386	SPCC1739.08c
-2.25281	SPCC794.04c
-2.2043	SPBC21D10.06c	map4
-2.16068	SPAC11H11.04	mam2
-2.08238	SPCC162.10	ppk33
-2.05552	SPBPB10D8.02c
-1.98221	SPBC4.01
-1.92284	SPAC31G5.09c	spk1
-1.9062	SPAC11E3.06	map1
-1.87081	SPCC4B3.08	lsg1
-1.82713	SPAP8A3.04c	hsp9
-1.71186	SPBC24C6.06	gpa1
-1.68889	SPCC1393.07c	mug4
-1.66534	SPBC32C12.02	ste11
-1.62917	SPAC1296.03c	sxa2
-1.60977	SPAC1565.04c	ste4
-1.60644	SPACUNK4.17
-1.56711	SPAP7G5.03
-1.5542	SPBC215.11c
-1.4635	SPBC1604.01	mug158
-1.46228	SPBC2G5.09c	mam1
-1.42769	SPBC19C2.04c	ubp11
-1.40321	SPAC22F8.05
-1.36341	SPAPB2B4.03	cig2
-1.35137	SPAC1486.01
-1.34819	SPAC3G9.11c
-1.33342	SPAPJ691.02
-1.33245	SPBC365.12c	ish1
-1.31435	SPAC10F6.12c	mam4
-1.25463	SPBC146.02
-1.24498	SPAC26F1.04c	atr1
-1.23705	SPAC23E2.03c	ste7
-1.23453	SPAC31G5.07
-1.23207	SPBP4H10.12
-1.21951	SPAC637.03
-1.21606	SPAC644.08
-1.2125	SPAC26H5.08c	bgl2
-1.20551	SPBC839.18c
-1.17252	SPAC11E3.09	pyp3
-1.14669	SPBC359.06	mug15
-1.10601	SPAC3F10.09
-1.10227	SPBC1683.08	ght4
-1.0793	SPBC21C3.19
-1.07218	SPAC27D7.09c
-1.06383	SPBC1773.02c
-1.05965	SPBC36.02c
-1.05884	SPCC61.05
-1.05081	SPAC9E9.01
-1.03512	SPBC336.12c	cdc10
-1.03341	SPBC1683.09c	frp1
-1.0166	SPAC1D4.13	byr1
-1.00594	SPBC354.08c
-1.00468	SPAC27D7.10c
