# Supplementary material for: The Fission Yeast Stress-Responsive MAPK Pathway Promotes Meiosis via the Phosphorylation of Pol II CTD in Response to Environmental and Feedback Cues
Source: PLoS Genet. 2011 Dec 1;7(12):e1002387. doi: 10.1371/journal.pgen.1002387 (PMC3228818; doi:10.1371/journal.pgen.1002387)
Supplement: Table S2 — S. pombe strains used in this study. (DOC) [file pgen.1002387.s007.doc]

**Table S2. *S. pombe*** strains used in this study

| Strain | Genotype |
| --- | --- |

JT659 *h90 lsg1::kan ade6-M216 leu1*

JT660 *h90 lsk1::kan ade6-M216 leu1*

JT661 *h90 lsc1::kan ade6-M216 leu1*

JT662 *h- lsg1::kan mei2::mei2-L-SATA ade6-M216 leu1 ura4-D18*

JT663 *h- lsk1::kan mei2::mei2-L-SATA ade6-M216 leu1 ura4-D18*

JT664 *h- lsc1::kan mei2::mei2-L-SATA ade6-M216 leu1 ura4-D18*

JT665 *h+/h- lsg1::kan/lsg1::kan ade6-M210/ade6-M216 leu1/leu1*

JT666 *h+/h-* *lsk1::kan/lsk1::kan ade6-M210/ade6-M216 leu1/leu1*

JT667 *h+/h- lsc1::kan/lsc1::kan ade6-M210/ade6-M216 leu1/leu1*

JT668 *h90 rpb1-12xCTD<<ura4+ ade6-M216 leu1 ura4-D18*

JT669 *h90 rpb1-12xS2ACTD<<ura4+ ade6-M216 leu1 ura4-D18*

JT670 *h90 lsg1-GFP<<kan ade6-M216 leu1*

JT671 *h90 lsk1-GFP<<kan ade6-M216 leu1*

JT672 *h90 lsc1-GFP<<kan ade6-M216 leu1*

JT673 *h90 fcp1-GFP<<kan ade6-M216 leu1*

JT674 *h90 sty1::kan ade6-M216 leu1*

JT675 *h- lsk1::kan leu1::P41nmt1-mei2-SATA<<ura4+ ura4-D18 ade6-M210*

JT676 *h- sty1::kan leu1::P41nmt1-mei2-SATA<<ura4+ ura4-D18 ade6-M210*

JT677 *h- wis4::kan leu1::P41nmt1-mei2-SATA<<ura4+ ura4-D18 ade6-M210*

JT678 *h- win1::hph leu1::P41nmt1-mei2-SATA<<ura4+ ura4-D18 ade6-M210*

JT679 *h- wis4::kan win1::hph leu1::P41nmt1-mei2-SATA<<ura4+ ura4-D18 ade6-M210*

JT680 *h- mcs4::kan leu1:: P41nmt1-mei2-SATA<<ura4+ ura4-D18 ade6-M210*

JT681 *h- ste11::kan leu1:: P41nmt1-mei2-SATA<<ura4+ ura4-D18 ade6-M210*

JT908 *h+/h- mei2-FA/mei2-FA ade6-M210/ade6-M216 leu1/leu1*

JT915 *h- lsk1::kan pat1-114 ade6-M216 leu1*

JV312 *h- mei2::mei2-L-SATA ade6-M216 leu1 ura4-D18*

JW92 *h- mei2::ura4+ pat1-114 ade6-M216 leu1 ura4-D18*

JX25 *h90 pcr1::ura4+ ade6-M216 leu1 ura4-D18*

JX231 *h90 rst2::ura4+ ade6-M216 leu1 ura4-D18*

JX303 *h90 atf1::ura4+ ade6-M216 leu1 ura4-D18*

JX382 *h- leu1:: P41nmt1-mei2<<ura4+ ura4-D18 ade6-M210*

JX383 *h- leu1::P41nmt1-mei2-SATA<<ura4+ ura4-D18 ade6-M210*

JY333 *h- ade6-M216 leu1*

JY362 *h+/h- ade6-M210/ade6-M216 leu1/leu1*

JY741 *h- ade6-M216 leu1 ura4-D18*

JY775 *h- mei2::ura4+ ade6-M216 leu1 ura4-D18*

JY776 *h+/h- mei2::ura4+/mei2::ura4+ ade6-M210/ade6-M216 leu1/leu1 ura4-D18/ ura4-D18*

JZ409 *h- pat1-114 ade6-M216 leu1*

JZ403 *h+/h- ste11::ura4+/ste11::ura4+ ade6-M210/ade6-M216 leu1/leu1 ura4-D18/ ura4-D18*

JY450 *h90 ade6-M216 leu1*

JZ127 *h90 mei2::ura4+ ade6-M216 leu1 ura4-D18*

JZ396 *h90 ste11::ura4+ ade6-M216 leu1 ura4-D18*

NJ761  *h- sty1::kan leu1:: P41nmt1-sty1-3Pk<<ura4+ ura4-D18*

NJ767  *h- sty1::kan leu1:: P41nmt1-sty1K49R-3Pk<<ura4+ ura4-D18*

|  |
| --- |
